# Supplementary material for: The Comparison of Adipose Stem Cell and Placental Stem Cell in Secretion Characteristics and in Facial Antiaging
Source: Hindawi journal article supplement (doi:10.1155/2016/7315830), 2016-01-01
Supplement: f1 [file 7315830.f1.pdf]

**Supplement 1:**  
**The details of peptide sequence identification by MALDI-TOF/TOF analysis**

**1.1**

| Source: Placenta stem cells |              |              |           |          |
|-----------------------------|--------------|--------------|-----------|----------|
| Peptide sequence            | Protein name | Mr<br>(expt) | Mr (calc) | Position |
| SWSVYVGAR                   | VEGF         | 1023.54      | 1023.51   | 162-170  |
| EICADPK                     | MCP-1        | 774.35       | 774.36    | 73-79    |
| AFLLVQDIMEDTMR              | M-CSF        | 1680.86      | 1680.82   | 85-98    |
| DNTPNAIAIVQLQEISLR          | M-CSF        | 1994.02      | 1994.08   | 101-118  |
| TFYETPLQLEK                 | M-CSF        | 1480.73      | 1480.78   | 136-148  |
| PDCNCLYPK                   | M-CSF        | 1051.42      | 1051.45   | 187-195  |
| STCQSFEPPETPVVK             | M-CSF        | 1647.71      | 1647.78   | 256-270  |
| DSTIGGSPQPR                 | M-CSF        | 1113.50      | 1113.54   | 271-281  |
| FSNISEGLSNYSIIDK            | SCF          | 1785.81      | 1785.88   | 88-103   |
| LVNIVDDLVECVK               | SCF          | 1457.84      | 1457.78   | 104-116  |
| PFMLPPVAASSLR               | SCF          | 1384.70      | 1384.75   | 182-194  |
| FFESHVAR                    | SDF-1        | 991.51       | 991.49    | 34-41    |

|                  |               |         |         |         |
|------------------|---------------|---------|---------|---------|
| MVGVGGGDVEDVTPR  | FGF-2         | 1486.67 | 1486.71 | 1-15    |
| PGGCQISGR        | FGF-2         | 873.40  | 873.41  | 16-24   |
| GCNGIPGAAAWAALPR | FGF-2         | 1652.85 | 1652.81 | 28-44   |
| WILTWILPTLLYR    | FGF-7         | 1686.93 | 1686.99 | 4-16    |
| SYDYMEGGDIR      | FGF-7         | 1304.50 | 1304.53 | 55-65   |
| ESTTDQYNTNALQR   | ANGP-1        | 1639.71 | 1639.74 | 56-69   |
| DAPHVEPDFSSQK    | ANGP-1        | 1455.62 | 1455.66 | 70-82   |
| LENYIVENMK       | ANGP-1        | 1251.59 | 1251.62 | 100-109 |
| LTDVETQVLNQTSR   | ANGP-1        | 1602.77 | 1602.82 | 145-158 |
| LEIQLENSLSTYK    | ANGP-1        | 1649.95 | 1649.89 | 159-172 |
| PSYVELTFSQHVR    | PGF           | 1561.72 | 1561.79 | 115-127 |
| QSPDMPGDFR       | PGF           | 1148.54 | 1148.49 | 137-146 |
| EILSILGLPHR      | TGF- $\beta$  | 1246.71 | 1246.74 | 57-67   |
| IPEGEAVTAAEFR    | TGF- $\beta$  | 1388.65 | 1388.69 | 163-175 |
| ISVYQVLQEHLGR    | TGF- $\beta$  | 1540.79 | 1540.84 | 192-204 |
| DVELAEEALPK      | TNF- $\alpha$ | 1212.64 | 1212.62 | 9-19    |
| DLSLISPLAQAVR    | TNF- $\alpha$ | 1381.75 | 1381.79 | 66-78   |
| QAASVVVAMDK      | IL-1          | 1117.56 | 1117.58 | 63-73   |
| SLVMSGPYELK      | IL-1          | 1222.66 | 1222.63 | 133-143 |
| PTLQLESVDPK      | IL-1          | 1225.63 | 1225.66 | 194-204 |
| YILDGISALR       | IL-6          | 1119.61 | 1119.63 | 59-68   |
| EALAENNINLPLK    | IL-6          | 1324.67 | 1324.70 | 83-94   |
| VNTADQCANR       | HGF           | 1090.46 | 1090.48 | 64-73   |
| QCLWFPFNSMSSGVK  | HGF           | 1729.86 | 1729.80 | 95-109  |
| EFGHEFDLYENK     | HGF           | 1526.62 | 1526.67 | 111-122 |
| GLMDHTESGK       | HGF           | 1073.50 | 1073.48 | 221-230 |
| ISSLPTQLFK       | IGF-1         | 1132.67 | 1132.65 | 4-13    |
| APQTGIVDECCFR    | IGF-1         | 1437.68 | 1437.64 | 86-98   |
| MSSSYPTGLADV     | AM            | 1354.61 | 1354.64 | 48-60   |
| SPEDSSPDAAR      | AM            | 1130.46 | 1130.48 | 79-89   |
| TQMIYQQHQSWLR    | PA            | 1717.78 | 1717.84 | 46-58   |
| VEYCWCSGR        | PA            | 1215.46 | 1215.48 | 66-75   |
| ATCYEDQGISYR     | PA            | 1404.56 | 1404.60 | 125-136 |
| LGLGNHNYCR       | PA            | 1145.51 | 1145.54 | 171-180 |
| VYTAQNPSAQLGLGK  | PA            | 1616.81 | 1616.85 | 248-263 |
| FPPHHLTVILGR     | PA            | 1385.75 | 1385.79 | 363-374 |
| CGWTGPGHSAR      | PDGF          | 1127.52 | 1127.49 | 45-55   |
| SIEEAVPAVCK      | PDGF          | 1144.56 | 1144.58 | 101-111 |
| QMQUEFFGLK       | MMP-1         | 1126.53 | 1126.55 | 66-74   |
| WEQTHLTYR        | MMP-1         | 1232.56 | 1232.59 | 109-117 |
| IENYTPDLPR       | MMP-1         | 1216.63 | 1216.61 | 118-127 |
| AFQLWSNVTPPLTFK  | MMP-1         | 1751.87 | 1751.92 | 137-151 |
| VSEGQADIMISFVR   | MMP-1         | 1550.73 | 1550.78 | 152-165 |

|                  |       |         |         |         |
|------------------|-------|---------|---------|---------|
| ELAVQYLNTFYGCPK  | MMP-2 | 1744.91 | 1744.85 | 48-62   |
| CGNPDVANYNFFPR   | MMP-2 | 1612.76 | 1612.71 | 102-115 |
| AFQVWSDVTPLR     | MMP-2 | 1417.69 | 1417.74 | 147-158 |
| IHDGEADIMINFR    | MMP-2 | 1586.68 | 1586.75 | 162-175 |
| QSTLVLFPGDLR     | MMP-9 | 1344.70 | 1344.74 | 25-36   |
| QLAEEYLYR        | MMP-9 | 1183.56 | 1183.59 | 66-76   |
| EYSTCTSEGR       | MMP-9 | 1151.75 | 1151.73 | 357-366 |
| FTEGPPLHK        | MMP-9 | 1131.44 | 1131.45 | 425-433 |
| PQGPFLIADK       | MMP-9 | 1024.55 | 1024.53 | 550-559 |
| LDSVFEEPLSK      | MMP-9 | 1262.67 | 1262.64 | 567-577 |
| VIESGPHCANTEIIVK | IL-8  | 1708.82 | 1708.88 | 54-69   |

## 1.2

| Source: Adipose stem cells |              |           |           |          |
|----------------------------|--------------|-----------|-----------|----------|
| Peptide sequence           | Protein name | Mr (expt) | Mr (calc) | Position |
| MAEGEITTF TALTEK           | FGF-1        | 1640.85   | 1640.80   | 1-15     |
| LLYCSNGGHFLR               | FGF-1        | 1378.65   | 1378.68   | 28-39    |
| MAGPATQSPMK                | G-CSF        | 1117.51   | 1117.53   | 1-11     |
| IQGDGAALQEK                | G-CSF        | 1128.60   | 1128.58   | 54-64    |
| GPLTMMASHYK                | GM-CSF       | 1234.54   | 1234.58   | 92-102   |
| DFLLVIPFDCWEPVQE           | GM-CSF       | 1949.01   | 1948.93   | 129-144  |
| YILDGISALR                 | IL-6         | 1119.64   | 1119.63   | 59-68    |
| EALAENNLNLPK               | IL-6         | 1324.73   | 1324.70   | 83-94    |
| LAAAVSNFGYDLYR             | PEDF         | 1558.73   | 1558.78   | 54-67    |
| ELLDTVTAPQK                | PEDF         | 1213.62   | 1213.66   | 124-134  |
| TSLEDFYLDEER               | PEDF         | 1515.63   | 1515.67   | 226-237  |
| YGLDSDLCK                  | PEDF         | 1099.50   | 1099.49   | 253-262  |
| GFQALGDAADIR               | TIMP-1       | 1232.63   | 1232.61   | 71-82    |
| EPGLCTWQSLR                | TIMP-1       | 1288.59   | 1288.62   | 193-203  |
| GSYPDAILQAQAADK            | PAI          | 1546.72   | 1546.76   | 88-102   |
| MVLVNAVYFK                 | PAI          | 1182.63   | 1182.65   | 196-205  |
| LNIGYIEDLK                 | PAI          | 1176.62   | 1176.64   | 241-250  |
| MAEDEVEVYIPQFK             | PAI          | 1696.75   | 1696.80   | 300-313  |
| MTAASMGpVR                 | CTGF         | 1019.48   | 1019.49   | 1-10     |
| VAFVVLLALCSR               | CTGF         | 1289.72   | 1289.75   | 11-22    |
| PAVGQNCSGPCR               | CTGF         | 1187.48   | 1187.52   | 23-34    |
| GLFCHFGSPANR               | CTGF         | 1304.64   | 1304.61   | 79-90    |
| AGAPGPHGPVGPAGK            | Collagen I   | 1268.63   | 1268.66   | 1-14     |
| TGHPGTVGPAGIR              | Collagen I   | 1218.67   | 1218.65   | 109-121  |
| VYCDFSTGETCIR              | Collagen I   | 1492.69   | 1492.63   | 234-246  |
| EMATQLAFMR                 | Collagen I   | 1196.55   | 1196.57   | 290-299  |
| GDPGEAGPQGDQGR             | Collagen VI  | 1339.61   | 1339.58   | 22-35    |

|                  |               |         |         |           |
|------------------|---------------|---------|---------|-----------|
| HLFVQDPQTCK      | VEGF          | 1314.61 | 1314.64 | 193-203   |
| ILNTPNCALQIVAR   | SDF-1         | 1524.90 | 1524.84 | 49-62     |
| ISVYQVLQEHGR     | TGF- $\beta$  | 1540.90 | 1540.84 | 192-204   |
| LAGLIGRHGPQNK    | TGF- $\beta$  | 1359.74 | 1359.77 | 261-273   |
| MANVAENSSSDQR    | TGF- $\beta$  | 1407.64 | 1407.60 | 315-327   |
| EALAEENLNLPK     | TGF- $\beta$  | 1324.74 | 1324.70 | 83-94     |
| DGCFQSGFNEETCLVK | TGF- $\beta$  | 1775.69 | 1775.75 | 99-114    |
| PWCYTLDPHTR      | HGF           | 1387.42 | 1387.46 | 269-279   |
| GTVNTIWNIGIPCQR  | HGF           | 1557.71 | 1557.77 | 315-328   |
| NYMGNLSQTR       | HGF           | 1182.53 | 1182.55 | 398-407   |
| HIFWEPDASK       | HGF           | 1228.57 | 1228.59 | 425-434   |
| SIEEAVPAVCK      | PDGF          | 1144.60 | 1144.58 | 101-111   |
| CTGCCNTSSVK      | PDGF          | 1101.41 | 1101.43 | 143-153   |
| WEHGDGYFPDGK     | MMP-2         | 1406.55 | 1406.59 | 176-187   |
| YGNADGEYCK       | MMP-2         | 1118.41 | 1118.43 | 225-234   |
| EYNSCTDTGR       | MMP-2         | 1144.46 | 1144.45 | 243-252   |
| IDAVYEAPQEEK     | MMP-2         | 1390.61 | 1390.66 | 520-531   |
| DVELAEELPK       | TNF- $\alpha$ | 1212.59 | 1212.62 | 9-19      |
| DLSLISPLAQAVR    | TNF- $\alpha$ | 1381.82 | 1381.79 | 66-78     |
| APQTGIVDECCFR    | IGF-1         | 1437.59 | 1437.64 | 86-98     |
| DSMIWDCTCIGAGR   | FN            | 1526.67 | 1526.63 | 117-130   |
| CHEGGQSYK        | FN            | 1007.42 | 1007.41 | 141-149   |
| GNLLQCICTGNR     | FN            | 1347.61 | 1347.64 | 253-265   |
| TFYSCCTTEGR      | FN            | 1163.47 | 1163.49 | 370-379   |
| WCGTTQNYDADQK    | FN            | 1528.59 | 1528.63 | 445-457   |
| GEWTCIAYSQLR     | FN            | 1425.62 | 1425.67 | 504-515   |
| TYHVGEQWQK       | FN            | 1274.57 | 1274.60 | 2301-2310 |
| QAASVVVAMDK      | IL-1          | 1117.60 | 1117.58 | 63-73     |
| SLVMSGPYELK      | IL-1          | 1222.59 | 1222.63 | 133-143   |
| VIESGPHCANTEIIVK | IL-8          | 1708.95 | 1708.88 | 54-69     |
